# Supplementary material for: Detection of serum EphA2-EVs for pancreatic cancer diagnosis by light initiated chemiluminescent assay
Source: Royal Society of Chemistry journal article supplement (doi:10.1039/d1ay02083h), 2022-01-01
Supplement: d1ay02083h1.pdf [file d1ay02083h1.pdf]

*Supplementary Information*

**Detection of Serum EphA2-EVs for Pancreatic Cancer Diagnosis by Light  
Initiated Chemiluminescent Assay**

**Wenhan Li<sup>†a</sup>, Xiaojun Yang<sup>†a</sup>, Tingting Bai<sup>a</sup>, Junwen Xu<sup>a</sup>, Zhuyin Qian<sup>a</sup>, Yawen Li<sup>a</sup>,**

**Zhirui Guo<sup>\*a</sup>, Yefei Zhu<sup>\*a,b</sup>**

<sup>a</sup> Laboratory Medicine Center, The Second Affiliated Hospital of Nanjing Medical University, Nanjing 210011,  
China

<sup>b</sup> School of Biological Science & Medical Engineering, Southeast University, Nanjing 210096, China

\*Correspondence: zhiruiguo@njmu.edu.cn; zhuyf@njmu.edu.cn

**Table. S1** Comparison about the EV concentrations, size distribution, protein concentration and the ratio of protein concentration to particle number concentration of EVs isolated from PANC1, MiaPaCa2, BxPC3 and HPNE by differential ultra-centrifugation.

|          | Particles concentration (particals/mL) | Size distribution (nm) | Protein concentration ( $\mu\text{g}/\mu\text{L}$ ) | particle number / protein (particals/ $\mu\text{g}$ ) |
|----------|----------------------------------------|------------------------|-----------------------------------------------------|-------------------------------------------------------|
| PANC1    | $1.33\pm 0.13\times 10^{11}$           | $137\pm 44$            | $0.363\pm 0.034$                                    | $3.69\pm 0.38\times 10^8$                             |
| MiaPaCa2 | $2.78\pm 0.44\times 10^{11}$           | $143\pm 56$            | $0.816\pm 0.052$                                    | $3.41\pm 0.32\times 10^8$                             |
| BxPC3    | $5.30\pm 0.37\times 10^{11}$           | $165\pm 78$            | $0.844\pm 0.087$                                    | $6.31\pm 0.21\times 10^8$                             |
| HPNE     | $2.44\pm 0.42\times 10^{11}$           | $132\pm 50$            | $1.15\pm 0.21$                                      | $2.12\pm 0.083\times 10^8$                            |

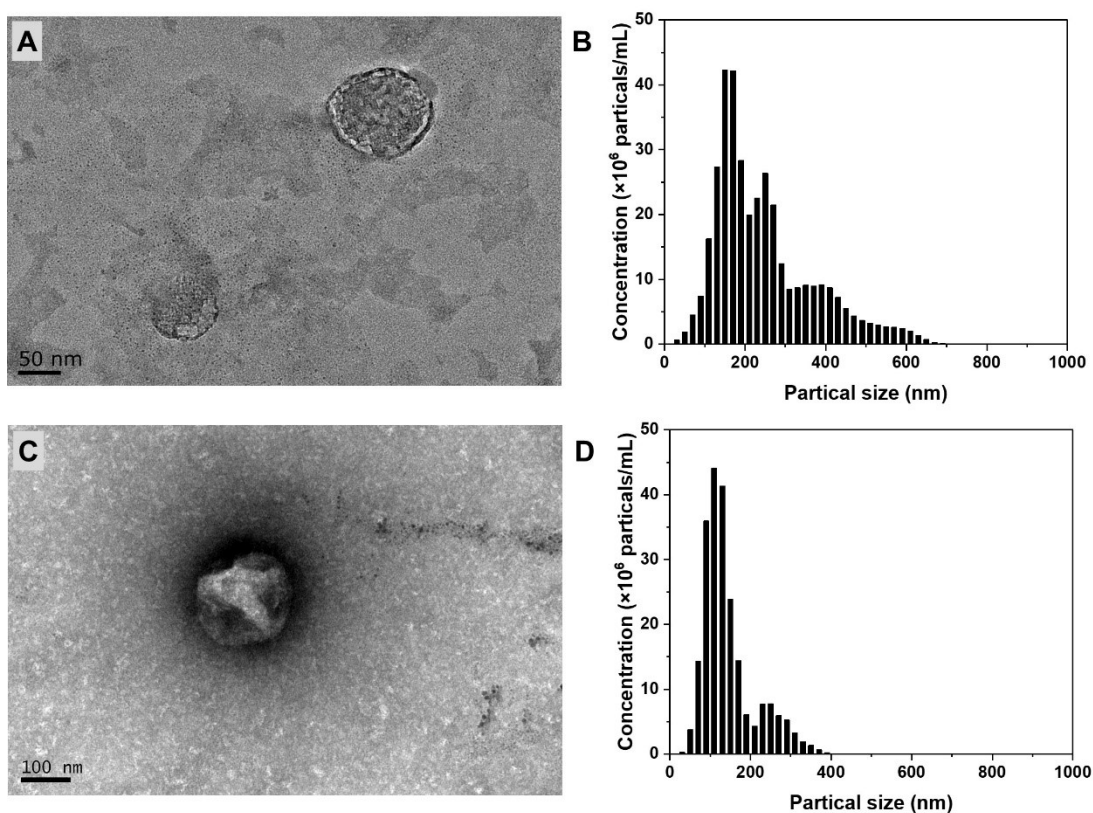

**Fig. S1.** Comparison of different EVs extraction methods, (A,B) TEM image and NTA of the EVs purified from PANC1 cell culture by exosomes isolation kits, (C,D) TEM image and NTA of the EVs purified from PANC1 cell culture by PEG-based vesicles enrichment.

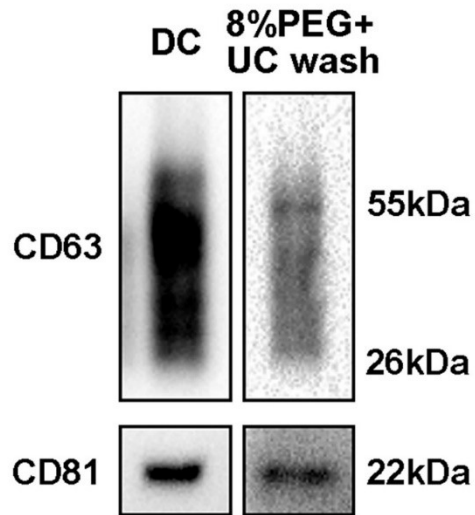

**Fig. S2.** Western Blot was used to compare the protein concentration of EVs purified from PANC1 cell culture by differential ultra-centrifugation method and PEG-based vesicles enrichment.

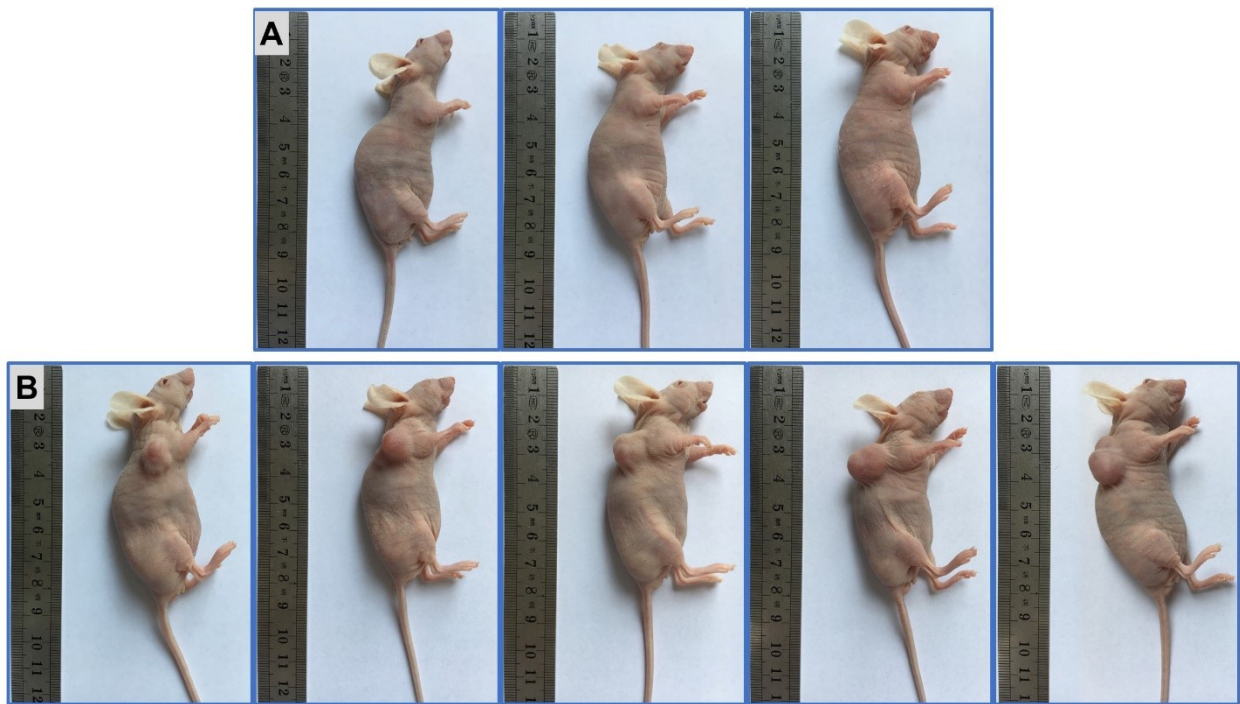

**Fig. S3.** Xenograft model in nude mice after 60 days of PANC1 cell injection: (A) control group and (B) tumor group.

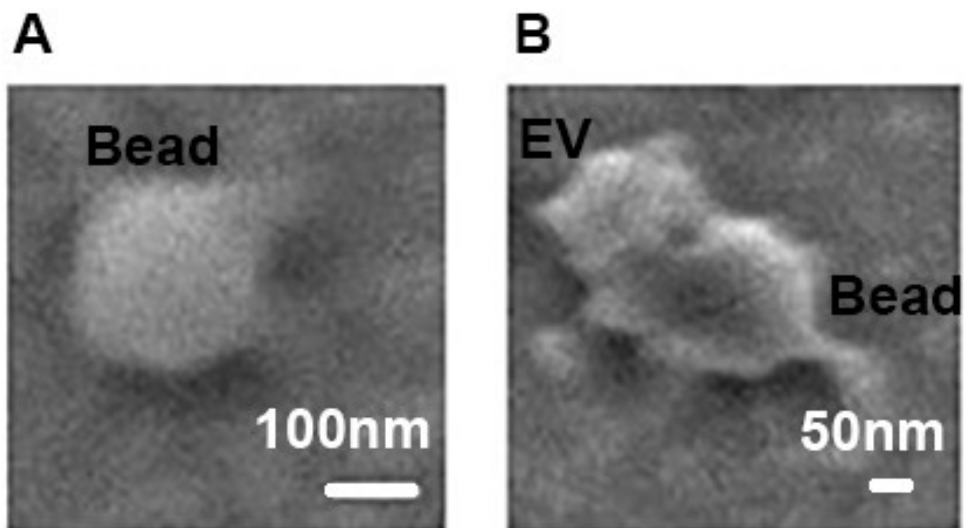

**Fig. S4.** (A) SEM image of the bead in this LICA method, (B) SEM image of particles after EVs capture.

**Table. S2** Comparison of the LICA method and ELISA

|                 | LICA                  | ELISA                                         |
|-----------------|-----------------------|-----------------------------------------------|
| Incubation time | 3.5 h                 | >4h + plates coating time+sample purification |
| Washes          | No, less manual steps | Yes, more influence of artificial factors     |
| Sample volume   | 5 $\mu$ L             | >100 $\mu$ L                                  |
